# Supplementary material for: Magnetization and optical bandgap of Cu-Mn vanadate-oxide mixed phase nanostructures
Source: Springer Nature journal article supplement (doi:10.1007/s11051-022-05607-z), 2022-11-01
Supplement: MOESM1 [file 23669676]

# Magnetization and Optical Bandgap of Cu-Mn Vanadate-Oxide Mixed Phase Nanostructures

*Mahmoud Mohamed Emara,<sup>1,\*</sup> S. M. Reda,<sup>2</sup> Mohamad Awad El-Naggar,<sup>2</sup> Mahmoud*

*Ahmed Mousa<sup>2</sup>*

<sup>1</sup> Chemistry Department, Faculty of Science, Alexandria University, P.O. Box 426, Ibrahimia 21321, Alexandria, Egypt

\* Corresponding Author

<sup>2</sup> Chemistry Department, Faculty of Science, Benha University, Benha, Egypt

Correspondence:

Mahmoud Mohamed Emara

[mahmoud.emara@alexu.edu.eg](mailto:mahmoud.emara@alexu.edu.eg)

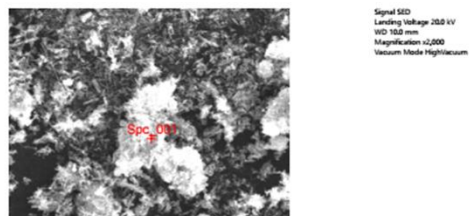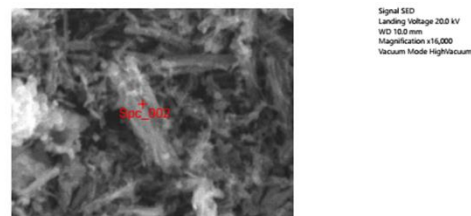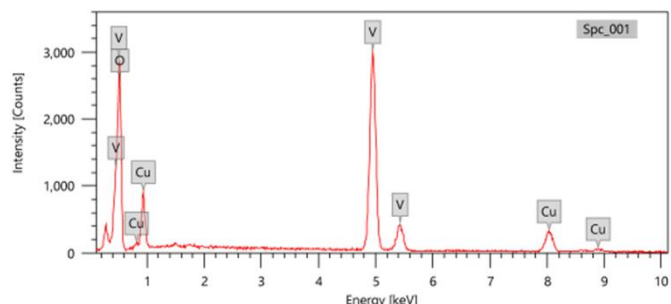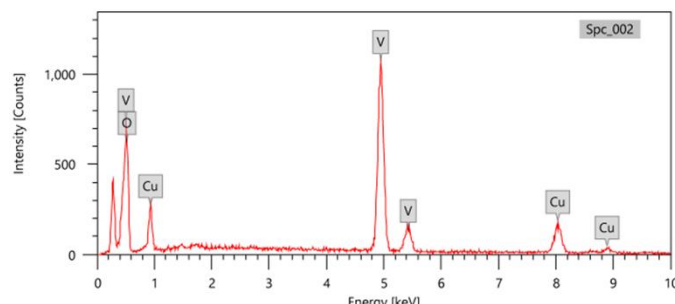

| Items                  | Value         | Display name                 | Standard data | Quantification method | Result Type |
|------------------------|---------------|------------------------------|---------------|-----------------------|-------------|
| measurement conditions |               | Spc_001                      | Standardless  | ZAF                   | Metal       |
| Acceleration voltage   | 20.00 kV      |                              |               |                       |             |
| Probe current          | -             |                              |               |                       |             |
| Magnification          | x 2000        |                              |               |                       |             |
| Process time           | T4            |                              |               |                       |             |
| Measurement detector   | First         |                              |               |                       |             |
| Live time              | 30.00 seconds |                              |               |                       |             |
| Real time              | 32.64 seconds |                              |               |                       |             |
| Dead time              | 8.00 %        |                              |               |                       |             |
| Count rate             | 4312.00 CPS   |                              |               |                       |             |
|                        |               | Element                      | Line          | Mass%                 | Atom%       |
|                        |               | O                            | K             | 48.53±0.51            | 75.90±0.80  |
|                        |               | V                            | K             | 39.44±0.27            | 19.37±0.13  |
|                        |               | Cu                           | K             | 12.03±0.24            | 4.74±0.09   |
|                        |               | Total                        |               | 100.00                | 100.00      |
|                        |               | Spc_001 Fitting ratio 0.0409 |               |                       |             |

| Items                  | Value         | Display name                 | Standard data | Quantification method | Result Type |
|------------------------|---------------|------------------------------|---------------|-----------------------|-------------|
| measurement conditions |               | Spc_002                      | Standardless  | ZAF                   | Metal       |
| Acceleration voltage   | 20.00 kV      |                              |               |                       |             |
| Probe current          | -             |                              |               |                       |             |
| Magnification          | x 16000       |                              |               |                       |             |
| Process time           | T4            |                              |               |                       |             |
| Measurement detector   | First         |                              |               |                       |             |
| Live time              | 30.00 seconds |                              |               |                       |             |
| Real time              | 31.45 seconds |                              |               |                       |             |
| Dead time              | 5.00 %        |                              |               |                       |             |
| Count rate             | 1668.00 CPS   |                              |               |                       |             |
|                        |               | Element                      | Line          | Mass%                 | Atom%       |
|                        |               | O                            | K             | 36.13±0.85            | 65.73±1.55  |
|                        |               | V                            | K             | 44.24±0.52            | 25.28±0.30  |
|                        |               | Cu                           | K             | 19.62±0.55            | 8.99±0.25   |
|                        |               | Total                        |               | 100.00                | 100.00      |
|                        |               | Spc_002 Fitting ratio 0.1334 |               |                       |             |

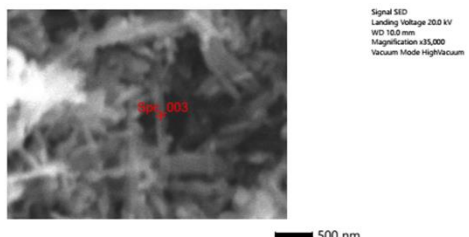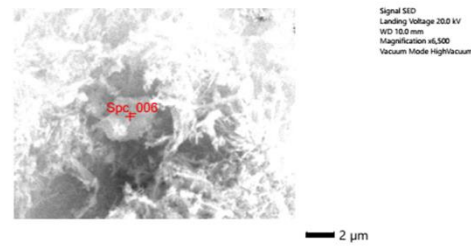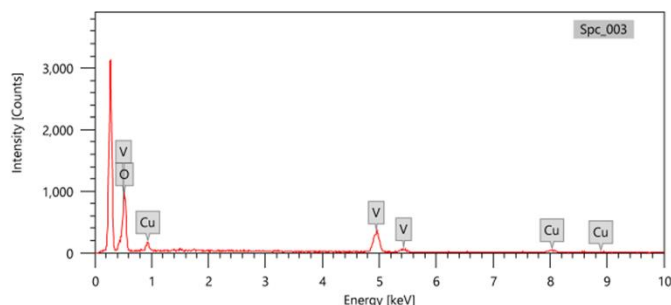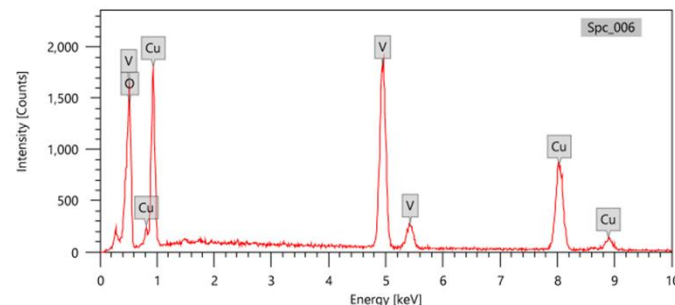

| Items                  | Value         | Display name                 | Standard data | Quantification method | Result Type |
|------------------------|---------------|------------------------------|---------------|-----------------------|-------------|
| measurement conditions |               | Spc_003                      | Standardless  | ZAF                   | Metal       |
| Acceleration voltage   | 20.00 kV      |                              |               |                       |             |
| Probe current          | -             |                              |               |                       |             |
| Magnification          | x 35000       |                              |               |                       |             |
| Process time           | T4            |                              |               |                       |             |
| Measurement detector   | First         |                              |               |                       |             |
| Live time              | 30.00 seconds |                              |               |                       |             |
| Real time              | 31.11 seconds |                              |               |                       |             |
| Dead time              | 4.00 %        |                              |               |                       |             |
| Count rate             | 1678.00 CPS   |                              |               |                       |             |
|                        |               | Element                      | Line          | Mass%                 | Atom%       |
|                        |               | O                            | K             | 70.31±1.05            | 88.76±1.32  |
|                        |               | V                            | K             | 22.96±0.48            | 9.10±0.19   |
|                        |               | Cu                           | K             | 6.73±0.42             | 2.14±0.13   |
|                        |               | Total                        |               | 100.00                | 100.00      |
|                        |               | Spc_003 Fitting ratio 0.6949 |               |                       |             |

| Items                  | Value         | Display name                 | Standard data | Quantification method | Result Type |
|------------------------|---------------|------------------------------|---------------|-----------------------|-------------|
| measurement conditions |               | Spc_006                      | Standardless  | ZAF                   | Metal       |
| Acceleration voltage   | 20.00 kV      |                              |               |                       |             |
| Probe current          | -             |                              |               |                       |             |
| Magnification          | x 6500        |                              |               |                       |             |
| Process time           | T4            |                              |               |                       |             |
| Measurement detector   | First         |                              |               |                       |             |
| Live time              | 30.00 seconds |                              |               |                       |             |
| Real time              | 32.62 seconds |                              |               |                       |             |
| Dead time              | 8.00 %        |                              |               |                       |             |
| Count rate             | 4062.00 CPS   |                              |               |                       |             |
|                        |               | Element                      | Line          | Mass%                 | Atom%       |
|                        |               | O                            | K             | 26.97±0.39            | 57.02±0.82  |
|                        |               | V                            | K             | 31.08±0.27            | 20.64±0.18  |
|                        |               | Cu                           | K             | 41.95±0.49            | 22.34±0.26  |
|                        |               | Total                        |               | 100.00                | 100.00      |
|                        |               | Spc_006 Fitting ratio 0.0345 |               |                       |             |

Figure S1. Replicas of EDX scans for cCV at 4 different spots.

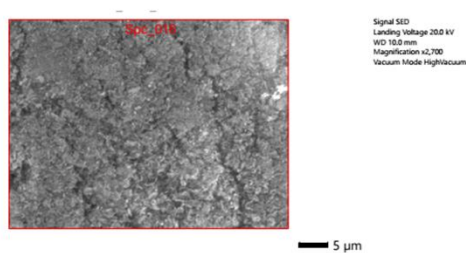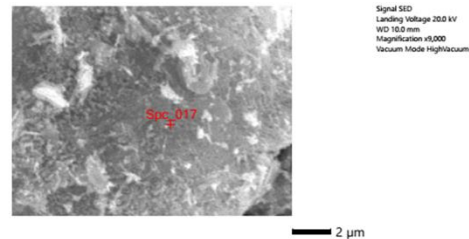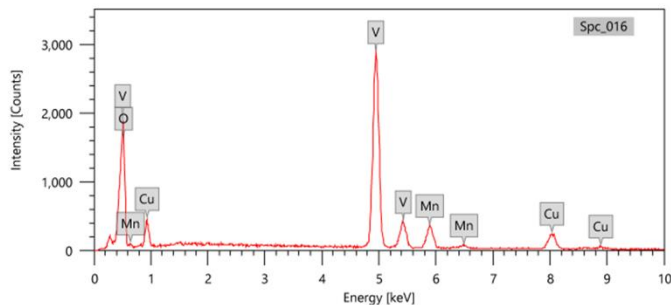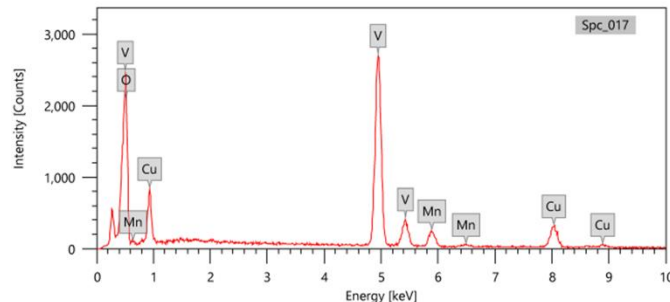

| Items                  | Value         | Display name | Standard data | Quantification method | Result Type          |
|------------------------|---------------|--------------|---------------|-----------------------|----------------------|
| measurement conditions |               | Spc_016      | Standardless  | ZAF                   | Metal                |
| Acceleration voltage   | 20.00 kV      |              |               |                       |                      |
| Probe current          | -             |              |               |                       |                      |
| Magnification          | x 2700        |              |               |                       |                      |
| Process time           | T4            |              |               |                       |                      |
| Measurement detector   | First         |              |               |                       |                      |
| Live time              | 30.00 seconds |              |               |                       |                      |
| Real time              | 32.52 seconds |              |               |                       |                      |
| Dead time              | 8.00 %        |              |               |                       |                      |
| Count rate             | 3969.00 CPS   |              |               |                       |                      |
|                        |               | Element      | Line          | Mass%                 | Atom%                |
|                        |               | O            | K             | 35.56±0.53            | 64.70±0.97           |
|                        |               | V            | K             | 45.94±0.32            | 26.25±0.19           |
|                        |               | Mn           | K             | 7.94±0.17             | 4.21±0.09            |
|                        |               | Cu           | K             | 10.56±0.25            | 4.84±0.11            |
|                        |               | Total        |               | 100.00                | 100.00               |
|                        |               | Spc_016      |               |                       | Fitting ratio 0.0326 |

| Items                  | Value         | Display name | Standard data | Quantification method | Result Type          |
|------------------------|---------------|--------------|---------------|-----------------------|----------------------|
| measurement conditions |               | Spc_017      | Standardless  | ZAF                   | Metal                |
| Acceleration voltage   | 20.00 kV      |              |               |                       |                      |
| Probe current          | -             |              |               |                       |                      |
| Magnification          | x 9000        |              |               |                       |                      |
| Process time           | T4            |              |               |                       |                      |
| Measurement detector   | First         |              |               |                       |                      |
| Live time              | 30.00 seconds |              |               |                       |                      |
| Real time              | 32.66 seconds |              |               |                       |                      |
| Dead time              | 8.00 %        |              |               |                       |                      |
| Count rate             | 4349.00 CPS   |              |               |                       |                      |
|                        |               | Element      | Line          | Mass%                 | Atom%                |
|                        |               | O            | K             | 39.59±0.53            | 68.72±0.92           |
|                        |               | V            | K             | 41.95±0.30            | 22.87±0.17           |
|                        |               | Mn           | K             | 4.95±0.13             | 2.50±0.07            |
|                        |               | Cu           | K             | 13.51±0.28            | 5.90±0.12            |
|                        |               | Total        |               | 100.00                | 100.00               |
|                        |               | Spc_017      |               |                       | Fitting ratio 0.0561 |

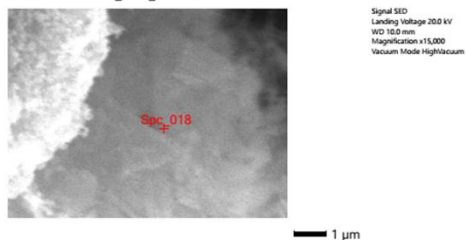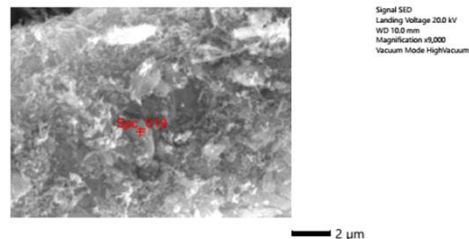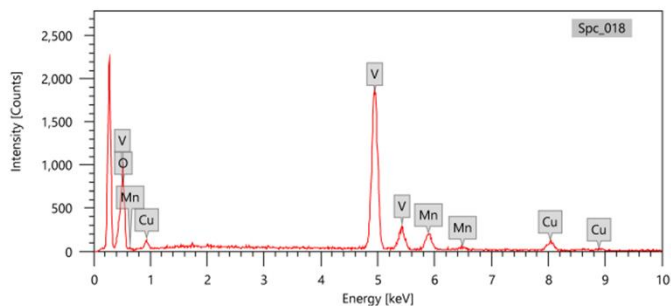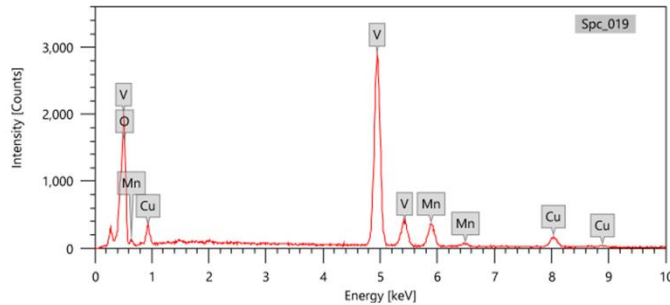

| Items                  | Value         | Display name | Standard data | Quantification method | Result Type          |
|------------------------|---------------|--------------|---------------|-----------------------|----------------------|
| measurement conditions |               | Spc_018      | Standardless  | ZAF                   | Metal                |
| Acceleration voltage   | 20.00 kV      |              |               |                       |                      |
| Probe current          | -             |              |               |                       |                      |
| Magnification          | x 15000       |              |               |                       |                      |
| Process time           | T4            |              |               |                       |                      |
| Measurement detector   | First         |              |               |                       |                      |
| Live time              | 30.00 seconds |              |               |                       |                      |
| Real time              | 31.87 seconds |              |               |                       |                      |
| Dead time              | 6.00 %        |              |               |                       |                      |
| Count rate             | 2766.00 CPS   |              |               |                       |                      |
|                        |               | Element      | Line          | Mass%                 | Atom%                |
|                        |               | O            | K             | 36.64±0.69            | 65.53±1.23           |
|                        |               | V            | K             | 48.62±0.42            | 27.31±0.24           |
|                        |               | Mn           | K             | 7.33±0.20             | 3.82±0.11            |
|                        |               | Cu           | K             | 7.41±0.27             | 3.34±0.12            |
|                        |               | Total        |               | 100.00                | 100.00               |
|                        |               | Spc_018      |               |                       | Fitting ratio 0.3182 |

| Items                  | Value         | Display name | Standard data | Quantification method | Result Type          |
|------------------------|---------------|--------------|---------------|-----------------------|----------------------|
| measurement conditions |               | Spc_019      | Standardless  | ZAF                   | Metal                |
| Acceleration voltage   | 20.00 kV      |              |               |                       |                      |
| Probe current          | -             |              |               |                       |                      |
| Magnification          | x 9000        |              |               |                       |                      |
| Process time           | T4            |              |               |                       |                      |
| Measurement detector   | First         |              |               |                       |                      |
| Live time              | 30.00 seconds |              |               |                       |                      |
| Real time              | 32.50 seconds |              |               |                       |                      |
| Dead time              | 8.00 %        |              |               |                       |                      |
| Count rate             | 3858.00 CPS   |              |               |                       |                      |
|                        |               | Element      | Line          | Mass%                 | Atom%                |
|                        |               | O            | K             | 37.72±0.56            | 66.60±0.99           |
|                        |               | V            | K             | 46.75±0.33            | 25.92±0.18           |
|                        |               | Mn           | K             | 8.26±0.17             | 4.25±0.09            |
|                        |               | Cu           | K             | 7.27±0.21             | 3.23±0.09            |
|                        |               | Total        |               | 100.00                | 100.00               |
|                        |               | Spc_019      |               |                       | Fitting ratio 0.0381 |

Figure S2. Replicas of EDX scans for cMCV4 at 4 different spots.

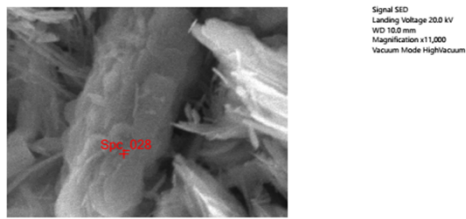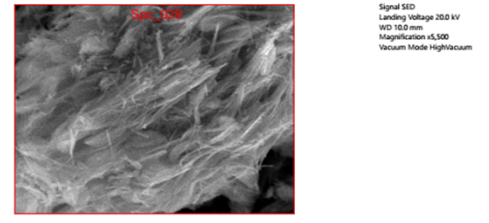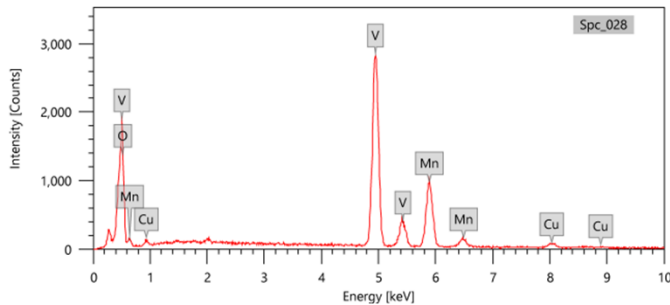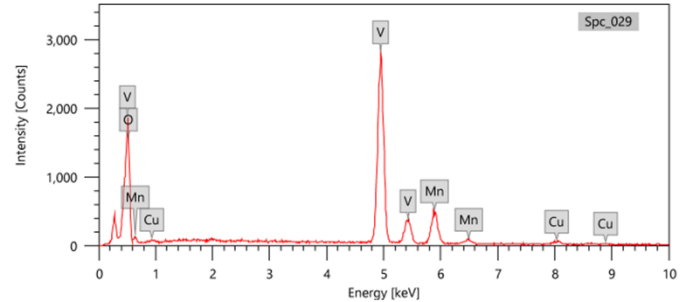

| Items                  | Value         | Display name | Standard data | Quantification method | Result Type          |
|------------------------|---------------|--------------|---------------|-----------------------|----------------------|
| measurement conditions |               | Spc_028      | Standardless  | ZAF                   | Metal                |
| Acceleration voltage   | 20.00 kV      |              |               |                       |                      |
| Probe current          | -             |              |               |                       |                      |
| Magnification          | x 11000       |              |               |                       |                      |
| Process time           | T4            |              |               |                       |                      |
| Measurement detector   | First         |              |               |                       |                      |
| Live time              | 30.00 seconds |              |               |                       |                      |
| Real time              | 32.68 seconds |              |               |                       |                      |
| Dead time              | 8.00 %        |              |               |                       |                      |
| Count rate             | 4204.00 CPS   |              |               |                       |                      |
|                        |               |              |               |                       | Fitting ratio 0.0417 |

| Items                  | Value         | Display name | Standard data | Quantification method | Result Type          |
|------------------------|---------------|--------------|---------------|-----------------------|----------------------|
| measurement conditions |               | Spc_029      | Standardless  | ZAF                   | Metal                |
| Acceleration voltage   | 20.00 kV      |              |               |                       |                      |
| Probe current          | -             |              |               |                       |                      |
| Magnification          | x 5500        |              |               |                       |                      |
| Process time           | T4            |              |               |                       |                      |
| Measurement detector   | First         |              |               |                       |                      |
| Live time              | 30.00 seconds |              |               |                       |                      |
| Real time              | 32.37 seconds |              |               |                       |                      |
| Dead time              | 7.00 %        |              |               |                       |                      |
| Count rate             | 3585.00 CPS   |              |               |                       |                      |
|                        |               |              |               |                       | Fitting ratio 0.0534 |

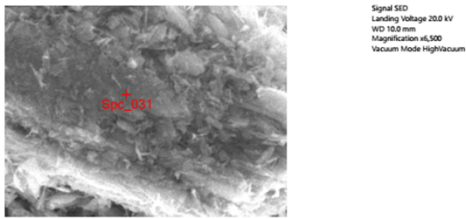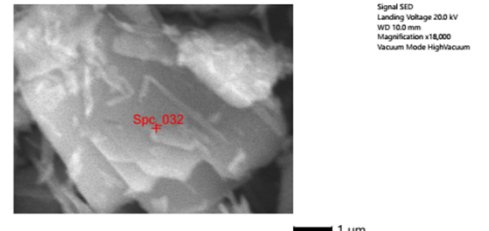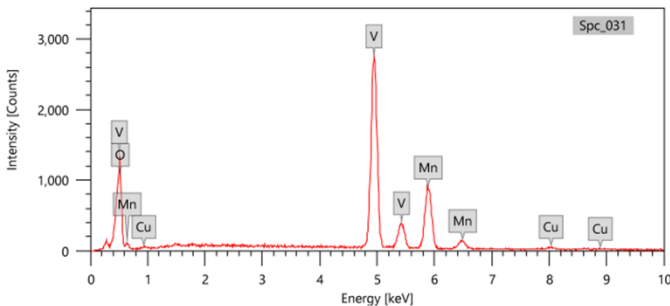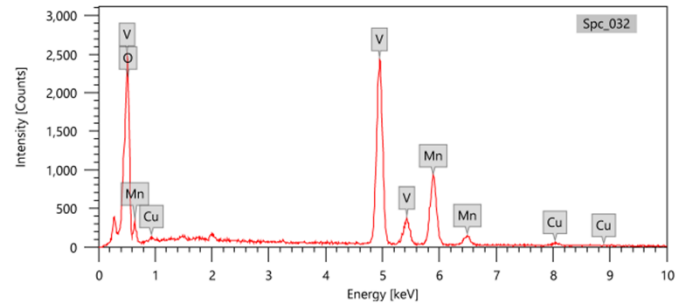

| Items                  | Value         | Display name | Standard data | Quantification method | Result Type          |
|------------------------|---------------|--------------|---------------|-----------------------|----------------------|
| measurement conditions |               | Spc_031      | Standardless  | ZAF                   | Metal                |
| Acceleration voltage   | 20.00 kV      |              |               |                       |                      |
| Probe current          | -             |              |               |                       |                      |
| Magnification          | x 6500        |              |               |                       |                      |
| Process time           | T4            |              |               |                       |                      |
| Measurement detector   | First         |              |               |                       |                      |
| Live time              | 30.00 seconds |              |               |                       |                      |
| Real time              | 32.44 seconds |              |               |                       |                      |
| Dead time              | 7.00 %        |              |               |                       |                      |
| Count rate             | 3637.00 CPS   |              |               |                       |                      |
|                        |               |              |               |                       | Fitting ratio 0.0303 |

| Items                  | Value         | Display name | Standard data | Quantification method | Result Type          |
|------------------------|---------------|--------------|---------------|-----------------------|----------------------|
| measurement conditions |               | Spc_032      | Standardless  | ZAF                   | Metal                |
| Acceleration voltage   | 20.00 kV      |              |               |                       |                      |
| Probe current          | -             |              |               |                       |                      |
| Magnification          | x 18000       |              |               |                       |                      |
| Process time           | T4            |              |               |                       |                      |
| Measurement detector   | First         |              |               |                       |                      |
| Live time              | 30.00 seconds |              |               |                       |                      |
| Real time              | 32.57 seconds |              |               |                       |                      |
| Dead time              | 8.00 %        |              |               |                       |                      |
| Count rate             | 4155.00 CPS   |              |               |                       |                      |
|                        |               |              |               |                       | Fitting ratio 0.0433 |

Figure S3. Replicas of EDX scans for cMCV6 at 4 different spots.

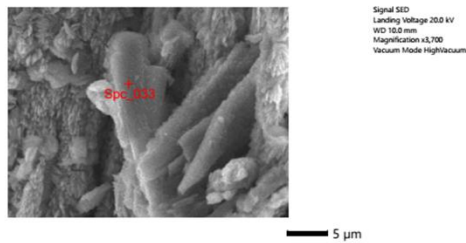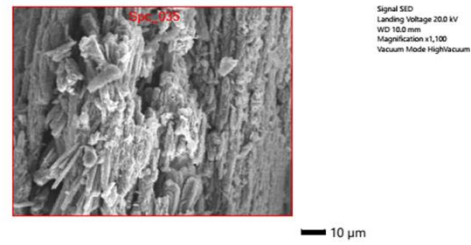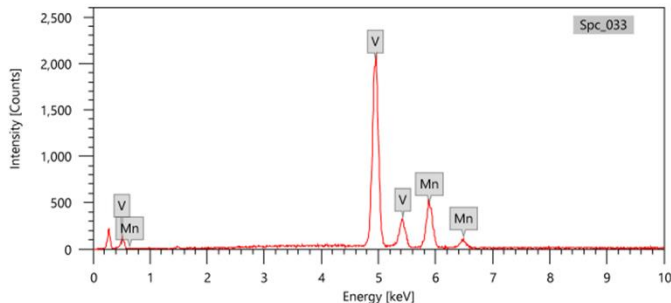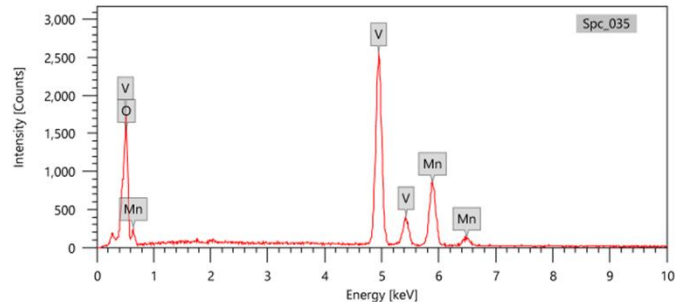

| Items                  | Value         | Display name   | Standard data | Quantification method | Result Type          |
|------------------------|---------------|----------------|---------------|-----------------------|----------------------|
| measurement conditions |               | Spc_033        | Standardless  | ZAF                   | Metal                |
| Acceleration voltage   | 20.00 kV      |                |               |                       |                      |
| Probe current          | -             |                |               |                       |                      |
| Magnification          | x 3700        |                |               |                       |                      |
| Process time           | T4            |                |               |                       |                      |
| Measurement detector   | First         |                |               |                       |                      |
| Live time              | 30.00 seconds |                |               |                       |                      |
| Real time              | 31.79 seconds |                |               |                       |                      |
| Dead time              | 6.00 %        |                |               |                       |                      |
| Count rate             | 1961.00 CPS   |                |               |                       |                      |
|                        |               |                |               |                       | Fitting ratio 0.0755 |
|                        |               | <b>Element</b> | <b>Line</b>   | <b>Mass%</b>          | <b>Atom%</b>         |
|                        |               | V              | K             | 71.95±0.60            | 73.45±0.61           |
|                        |               | Mn             | K             | 28.05±0.47            | 26.55±0.44           |
|                        |               | Total          |               | 100.00                | 100.00               |

| Items                  | Value         | Display name   | Standard data | Quantification method | Result Type          |
|------------------------|---------------|----------------|---------------|-----------------------|----------------------|
| measurement conditions |               | Spc_035        | Standardless  | ZAF                   | Metal                |
| Acceleration voltage   | 20.00 kV      |                |               |                       |                      |
| Probe current          | -             |                |               |                       |                      |
| Magnification          | x 1100        |                |               |                       |                      |
| Process time           | T4            |                |               |                       |                      |
| Measurement detector   | First         |                |               |                       |                      |
| Live time              | 30.00 seconds |                |               |                       |                      |
| Real time              | 32.42 seconds |                |               |                       |                      |
| Dead time              | 7.00 %        |                |               |                       |                      |
| Count rate             | 3555.00 CPS   |                |               |                       |                      |
|                        |               |                |               |                       | Fitting ratio 0.0321 |
|                        |               | <b>Element</b> | <b>Line</b>   | <b>Mass%</b>          | <b>Atom%</b>         |
|                        |               | O              | K             | 36.96±0.52            | 65.68±0.92           |
|                        |               | V              | K             | 41.59±0.31            | 23.22±0.18           |
|                        |               | Mn             | K             | 21.45±0.28            | 11.10±0.14           |
|                        |               | Total          |               | 100.00                | 100.00               |

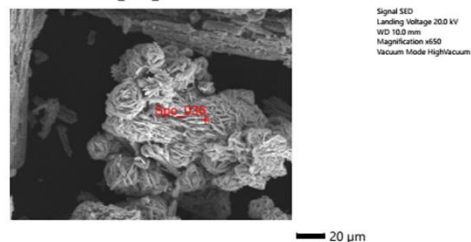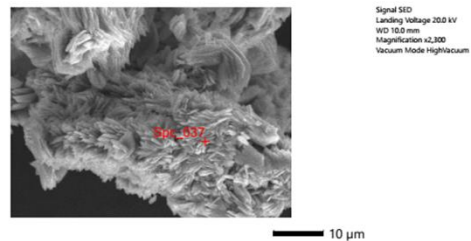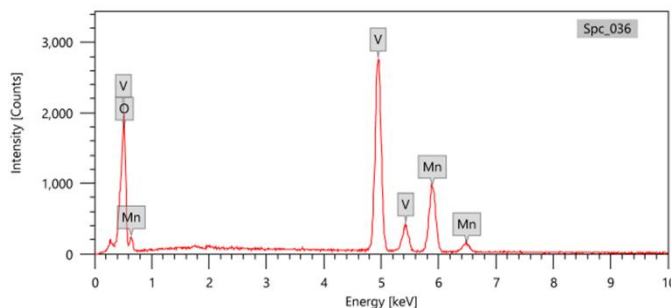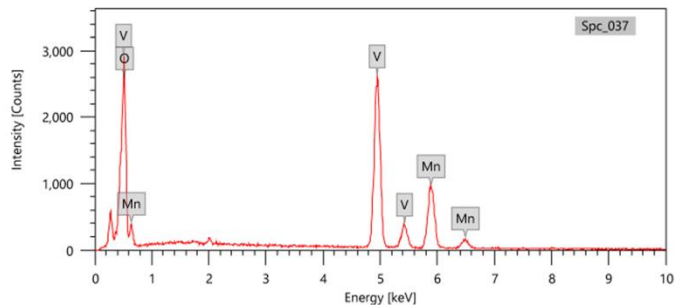

| Items                  | Value         | Display name   | Standard data | Quantification method | Result Type          |
|------------------------|---------------|----------------|---------------|-----------------------|----------------------|
| measurement conditions |               | Spc_036        | Standardless  | ZAF                   | Metal                |
| Acceleration voltage   | 20.00 kV      |                |               |                       |                      |
| Probe current          | -             |                |               |                       |                      |
| Magnification          | x 650         |                |               |                       |                      |
| Process time           | T4            |                |               |                       |                      |
| Measurement detector   | First         |                |               |                       |                      |
| Live time              | 30.00 seconds |                |               |                       |                      |
| Real time              | 32.61 seconds |                |               |                       |                      |
| Dead time              | 8.00 %        |                |               |                       |                      |
| Count rate             | 4012.00 CPS   |                |               |                       |                      |
|                        |               |                |               |                       | Fitting ratio 0.0280 |
|                        |               | <b>Element</b> | <b>Line</b>   | <b>Mass%</b>          | <b>Atom%</b>         |
|                        |               | O              | K             | 36.64±0.49            | 65.38±0.87           |
|                        |               | V              | K             | 41.43±0.30            | 23.22±0.17           |
|                        |               | Mn             | K             | 21.93±0.26            | 11.40±0.14           |
|                        |               | Total          |               | 100.00                | 100.00               |

| Items                  | Value         | Display name   | Standard data | Quantification method | Result Type          |
|------------------------|---------------|----------------|---------------|-----------------------|----------------------|
| measurement conditions |               | Spc_037        | Standardless  | ZAF                   | Metal                |
| Acceleration voltage   | 20.00 kV      |                |               |                       |                      |
| Probe current          | -             |                |               |                       |                      |
| Magnification          | x 2300        |                |               |                       |                      |
| Process time           | T4            |                |               |                       |                      |
| Measurement detector   | First         |                |               |                       |                      |
| Live time              | 30.00 seconds |                |               |                       |                      |
| Real time              | 32.69 seconds |                |               |                       |                      |
| Dead time              | 8.00 %        |                |               |                       |                      |
| Count rate             | 4429.00 CPS   |                |               |                       |                      |
|                        |               |                |               |                       | Fitting ratio 0.0566 |
|                        |               | <b>Element</b> | <b>Line</b>   | <b>Mass%</b>          | <b>Atom%</b>         |
|                        |               | O              | K             | 43.87±0.48            | 71.88±0.79           |
|                        |               | V              | K             | 35.68±0.27            | 18.36±0.14           |
|                        |               | Mn             | K             | 20.45±0.24            | 9.76±0.12            |
|                        |               | Total          |               | 100.00                | 100.00               |

Figure S4. Replicas of EDX scans for cMV at 4 different spots.
